# Supplementary material for: A sustainable and efficient process for the preparation of polyethylene–polystyrene interpolymer based anion exchange membranes by in situ chloromethylation for electrodialytic applications
Source: Royal Society of Chemistry journal article supplement (doi:10.1039/c7se00048k), 2017-01-01
Supplement: c7se00048k1.pdf [file c7se00048k1.pdf]

**Sustainable and efficient process for the preparation of polyethylene-polystyrene interpolymer based anion exchange membrane by in situ chloromethylation for electrodialytic applications**

<sup>a,b</sup>Vaibhavee Bhadja, <sup>a</sup>Souradeep Chakraborty, <sup>a</sup>Sandip Pal, <sup>a</sup>Rakhi Mondal, <sup>a</sup>B.S. Makwana and <sup>a,b</sup>Uma Chatterjee\*

<sup>a</sup>Electromembrane Processes Division, <sup>b</sup>AcSIR-Central Salt & Marine Chemicals Research Institute, Bhavnagar, Gujarat, India

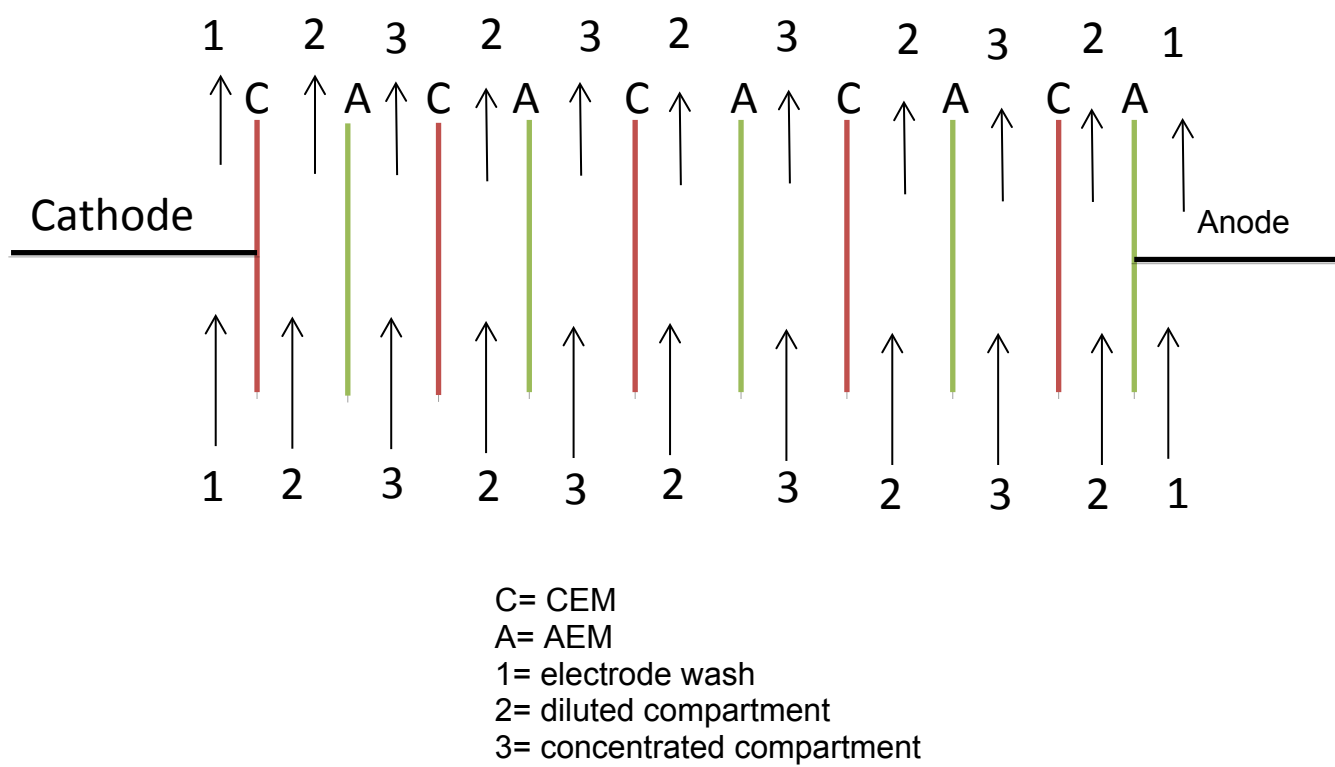

**Fig. S1** Schematic diagram of ED unit.

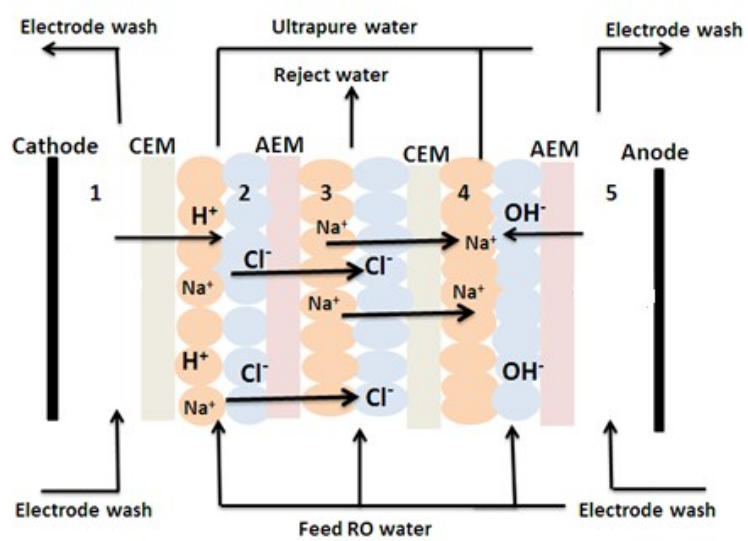

**Fig.S2** Schematic diagram of EDI unit
